# Supplementary material for: Perceptions of Health Care Use in Germany during the COVID-19 Pandemic
Source: Int J Environ Res Public Health. 2020 Dec 14;17(24):9351. doi: 10.3390/ijerph17249351 (PMC7764965; doi:10.3390/ijerph17249351)
Supplement: Supplementary file 1 [file ijerph-17-09351-s001.pdf]

**Table S1.** Sample characteristics for the three analytical samples (wave 8).

| Variables                                                                                 | First analytical sample<br>( <i>n</i> = 360) | Second analytical sample<br>( <i>n</i> = 374) | Third analytical sample<br>( <i>n</i> = 976) |
|-------------------------------------------------------------------------------------------|----------------------------------------------|-----------------------------------------------|----------------------------------------------|
| Sex                                                                                       |                                              |                                               |                                              |
| Men                                                                                       | 183 (50.8%)                                  | 187 (50.0%)                                   | 470 (48.2%)                                  |
| Women                                                                                     | 177 (49.2%)                                  | 187 (50.0%)                                   | 506 (51.8%)                                  |
| Age category                                                                              |                                              |                                               |                                              |
| 18 to 29 years                                                                            | 50 (13.9%)                                   | 50 (13.4%)                                    | 159 (16.3%)                                  |
| 30 to 49 years                                                                            | 148 (41.1%)                                  | 156 (41.7%)                                   | 378 (38.7%)                                  |
| 50 to 64 years                                                                            | 105 (29.2%)                                  | 111 (29.7%)                                   | 289 (29.6%)                                  |
| 65 years and over                                                                         | 57 (15.8%)                                   | 57 (15.2%)                                    | 150 (15.4%)                                  |
| Children under 18 years:                                                                  |                                              |                                               |                                              |
| No                                                                                        | 243 (67.5%)                                  | 260 (69.5%)                                   | 716 (73.4%)                                  |
| Yes                                                                                       | 117 (32.5%)                                  | 114 (30.5%)                                   | 260 (26.6%)                                  |
| Education                                                                                 |                                              |                                               |                                              |
| up to 9 years / 10 years and more (without general qualification for university entrance) | 161 (44.7%)                                  | 169 (45.2%)                                   | 428 (43.9%)                                  |
| 10 years and more (with general qualification for university entrance)                    | 199 (55.3%)                                  | 205 (54.8%)                                   | 548 (56.1%)                                  |
| Town size                                                                                 |                                              |                                               |                                              |
| Municipality/small town (1–20,000)                                                        | 136 (37.8%)                                  | 141 (37.7%)                                   | 369 (37.8%)                                  |
| Medium sized town (20,001–100,000)                                                        | 94 (26.1%)                                   | 101 (27.0%)                                   | 230 (23.6%)                                  |
| Small city (100,001–500,000)                                                              | 59 (16.4%)                                   | 62 (16.6%)                                    | 176 (18.0%)                                  |
| Big city (> 500,000)                                                                      | 71 (19.7%)                                   | 70 (18.7%)                                    | 201 (20.6%)                                  |
| Region                                                                                    |                                              |                                               |                                              |
| West Germany                                                                              | 301 (83.6%)                                  | 311 (83.2%)                                   | 833 (85.3%)                                  |
| East Germany                                                                              | 59 (16.4%)                                   | 63 (16.8%)                                    | 143 (14.7%)                                  |
| Cases/100,000 population                                                                  |                                              |                                               |                                              |
| Below median                                                                              | 172 (47.8%)                                  | 183 (48.9%)                                   | 450 (46.1%)                                  |
| Above median                                                                              | 188 (52.2%)                                  | 191 (51.1%)                                   | 526 (53.9%)                                  |
| Relationship/Marriage                                                                     |                                              |                                               |                                              |
| No                                                                                        | 95 (26.4%)                                   | 111 (29.7%)                                   | 300 (30.7%)                                  |
| Yes                                                                                       | 265 (73.6%)                                  | 263 (70.3%)                                   | 676 (69.3%)                                  |
| Living situation                                                                          |                                              |                                               |                                              |
| Living alone                                                                              | 75 (20.8%)                                   | 87 (23.3%)                                    | 244 (25.0%)                                  |
| At least 2 individuals in the same household                                              | 285 (79.2%)                                  | 287 (76.7%)                                   | 732 (75.0%)                                  |
| Migration background                                                                      |                                              |                                               |                                              |
| No                                                                                        | 299 (83.1%)                                  | 315 (84.2%)                                   | 840 (86.1%)                                  |
| Yes                                                                                       | 61 (16.9%)                                   | 59 (15.8%)                                    | 136 (13.9%)                                  |
| Self-employment                                                                           |                                              |                                               |                                              |
| No                                                                                        | 318 (88.3%)                                  | 332 (88.8%)                                   | 880 (90.2%)                                  |
| Yes                                                                                       | 42 (11.7%)                                   | 42 (11.2%)                                    | 96 (9.8%)                                    |
| Chronic disease                                                                           |                                              |                                               |                                              |
| No                                                                                        | 198 (55.0%)                                  | 196 (52.4%)                                   | 633 (64.9%)                                  |
| Yes                                                                                       | 162 (45.0%)                                  | 178 (47.6%)                                   | 343 (35.1%)                                  |
| Affect: COVID-19 infection (from 1 to 7; higher values correspond to higher affect)       | 4.3 (1.0)                                    | 4.4 (1.0)                                     | 4.3 (1.0)                                    |
| Severity: COVID-19 infection (from 1 to 7; higher values correspond to higher severity)   | 4.2 (1.6)                                    | 4.3 (1.6)                                     | 4.0 (1.5)                                    |
